# Supplementary material for: Nuclear localization sequence of MoHTR1, a Magnaporthe oryzae effector, for transcriptional reprogramming of immunity genes in rice
Source: PubMed Central journal article supplement — Nat Commun. 2024 Nov 11;15:9764. doi: 10.1038/s41467-024-54272-4 (PMC11555045; doi:10.1038/s41467-024-54272-4), 2024-11-11
Supplement: 41467_2024_54272_MOESM1_ESM.pdf [file 41467_2024_54272_MOESM1_ESM.pdf]

**A**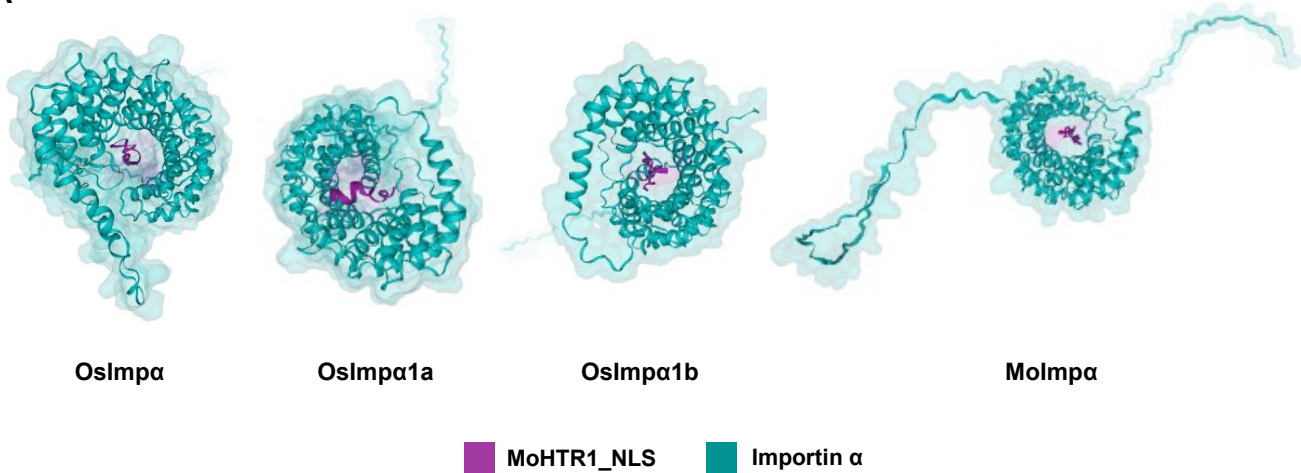**B**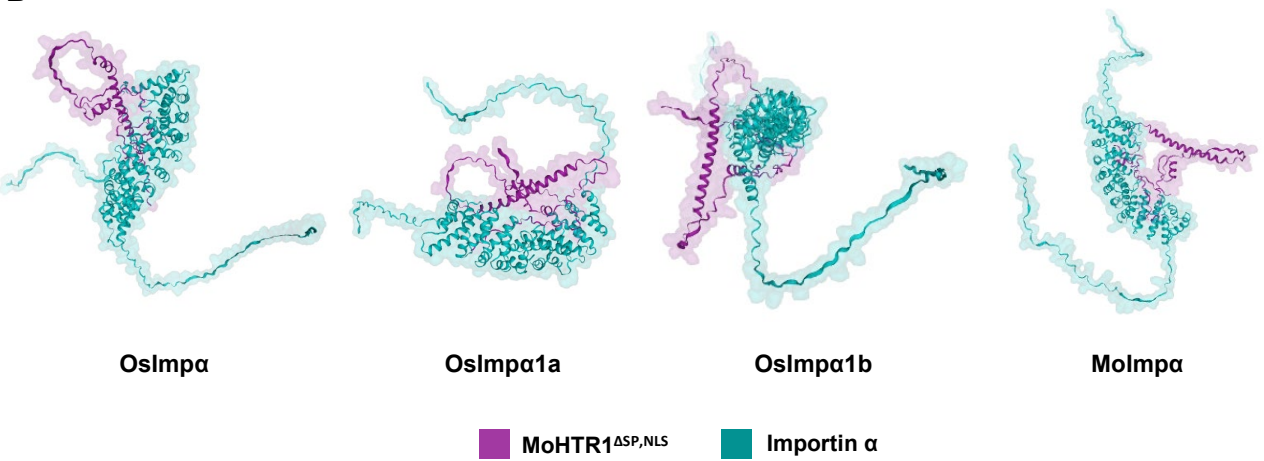

**Supplementary figure 1. Predicted interaction structures between MoHTR1 and importin  $\alpha$ .** **(A)** Predicted interaction models of MoHTR1 NLS (MoHTR1\_NLS) and importin  $\alpha$  of rice and rice blast fungus. **(B)** Predicted interaction models of signal peptide and NLS removed MoHTR1 (MoHTR1<sup>ΔSP,NLS</sup>) and importin  $\alpha$  of rice and rice blast fungus. Magenta color structures indicate MoHTR1\_NLS and MoHTR1<sup>ΔSP,NLS</sup> and cyan color structures indicate importin  $\alpha$ .

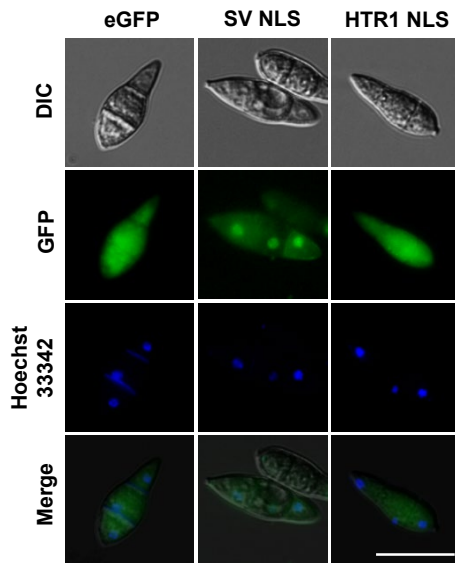

**Supplementary figure 2. Cytoplasm-to-nuclear translocation role of native NLS of MoHTR1 in fungal cells.** Subcellular localization of eGFP with native MoHTR1 NLS (HTR1 NLS) in the fungal conidia cells. SV NLS, well known cytoplasm to nuclear translocation associated NLS, was used to positive control. Nuclei was stained using Hoechst 33342. Scale bar; 20  $\mu$ m. Representative data are shown from independently experiments and source data are provided as a Source Data file.

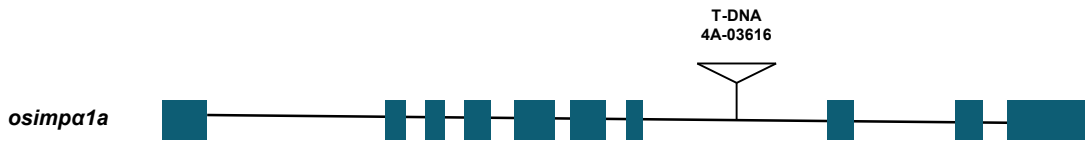

**Supplementary figure 3. Rice importin  $\alpha$  (Os01g14950.1, *OsImpa1a*) gene structure and insertion site of T-DNA.** Green boxes indicate exon regions and black line indicates intron regions of *OsImpa1a*.

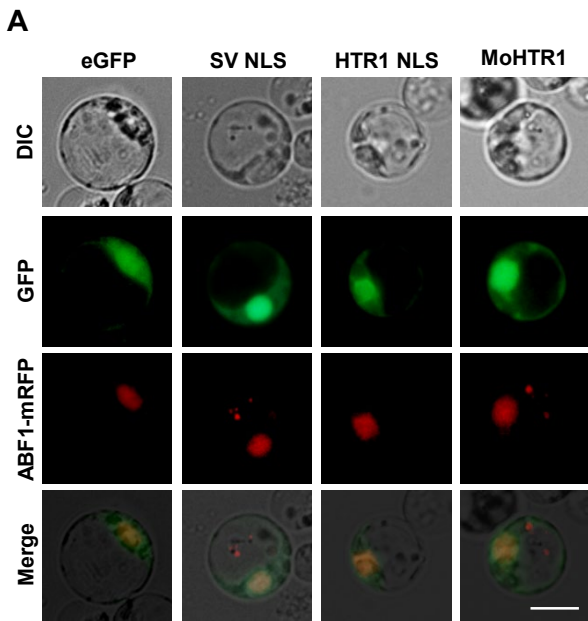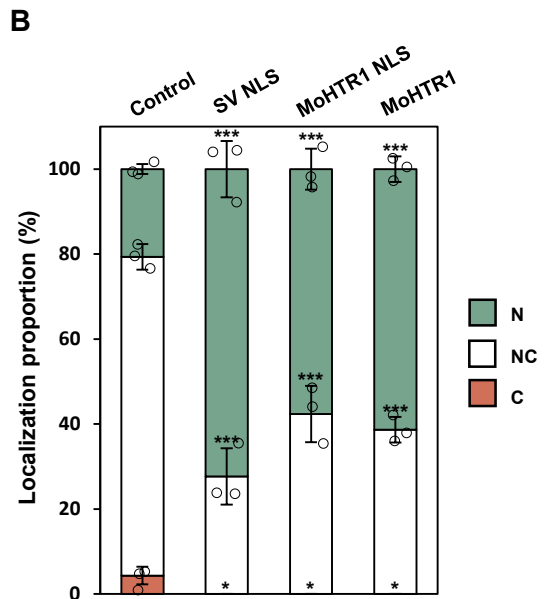

**Supplementary figure 4. Cytoplasm-to-nuclear translocation role of native NLS of MoHTR1. (A)** Subcellular localization of eGFP with Simian virus NLS (SV NLS), native MoHTR1 NLS (HTR1 NLS), and MoHTR1 in the rice protoplasts. SV NLS, well known cytoplasm to nuclear translocation associated NLS, was used to positive control. ABF1:mRFP was used for rice nuclei marker. Scale bar; 10  $\mu$ m. **(B)** Subcellular localization proportion of SV NLS, MoHTR1 NLS, and MoHTR1 in the rice protoplasts. Mean  $\pm$  SD, n = 3 independently transfected protoplasts, significance was determined by an unpaired two-tailed Student's t-test ( $*p < 0.05$  and  $***p < 0.001$ ). Representative data are shown from independently experiments and source data are provided as a Source Data file.

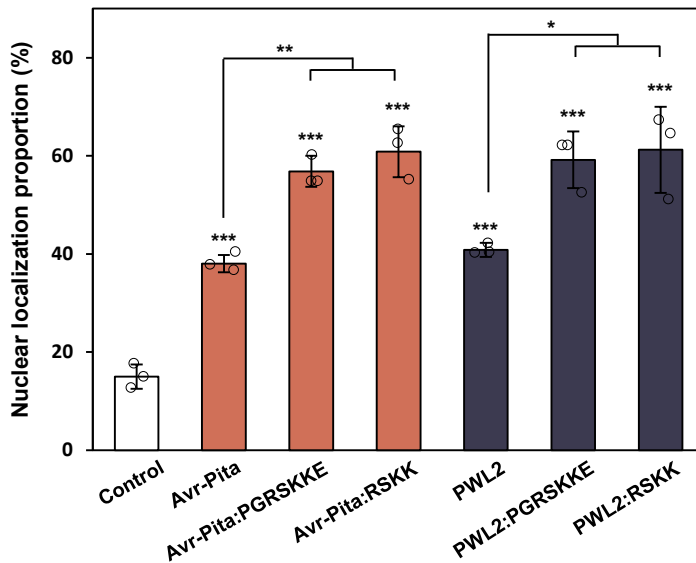

**Supplementary figure 5. The nuclear localization proportion of the two cytoplasmic effectors by tagging MoHTR1 NLS and key sequence of MoHTR1 NLS.** Intracellular localization of Avr-Pita and PWL2, two cytoplasmic effectors of *M. oryzae*, in the rice protoplast. Each cytoplasmic effectors were fused with MoHTR1 NLS (PGRSKKE) and key sequence of MoHTR1 NLS (RSKK), respectively and cloned into eGFP expressing plasmid under CaMV 35S promoter. The nuclear localization proportion of these cytoplasmic effectors were observed under fluorescence microscope. Mean  $\pm$  SD, n = 3 independently transfected protoplasts, significance was determined by an unpaired two-tailed Student's t-test (\*p < 0.05, \*\*p < 0.01, and \*\*\*p < 0.001). Representative data are shown from independently experiments and source data are provided as a Source Data file.

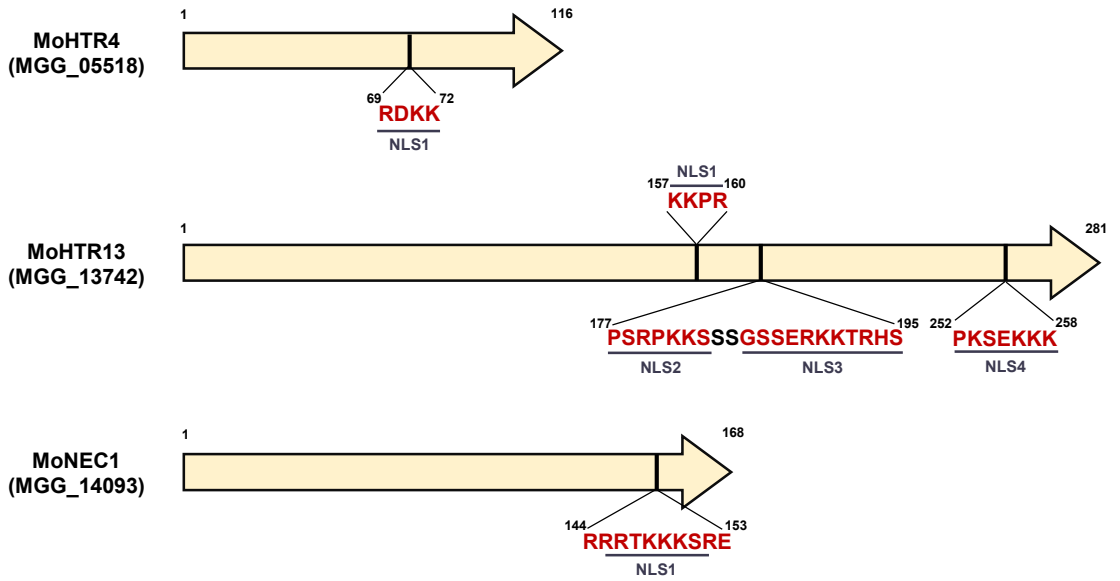

**Supplementary figure 6. Predicted NLS in the three nuclear effector candidates.** Black bar indicates location of predicted NLSs in each three nuclear effector candidates.

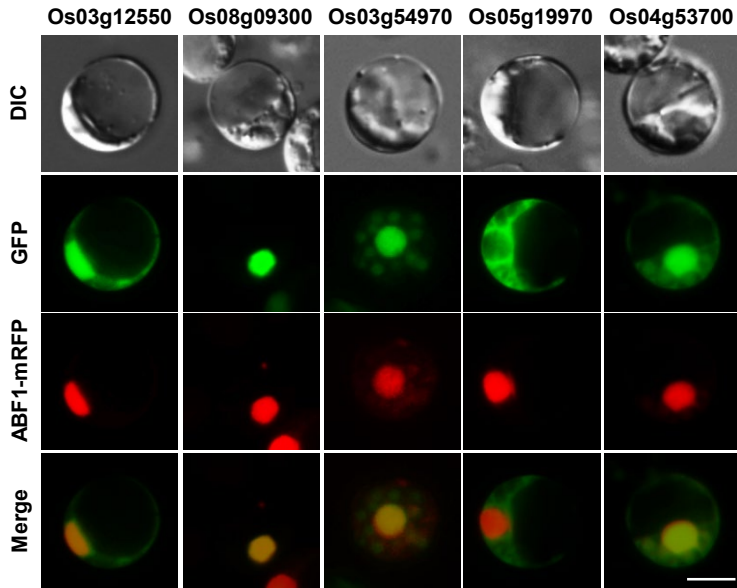

**Supplementary figure 7. Localization of RxKK sequences containing rice proteins in the rice protoplast.** Subcellular localization of eGFP with RxKK sequences containing rice proteins in the rice protoplasts. ABF1:mRFP was used for rice nuclei marker. Scale bar; 10  $\mu$ m. Representative data are shown from independently experiments and source data are provided as a Source Data file.

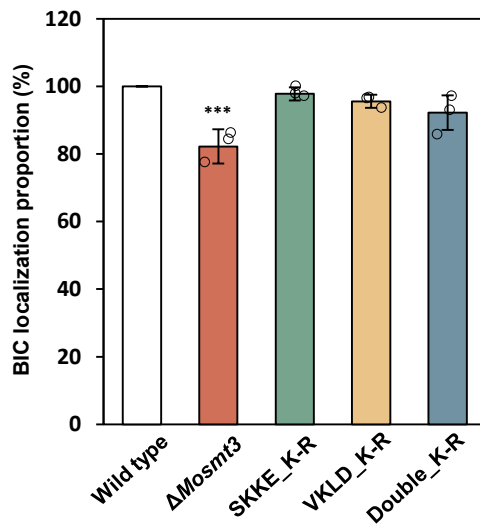

**Supplementary figure 8. BIC localization of SUMOylation defected MoHTR1.** The BIC localization proportion of SUMOylation site point mutants of MoHTR1 in the rice sheath cells. Significance was determined by *t*-test (\*\*\*)  $p < 0.001$ ). Mean  $\pm$  SD,  $n = 3$  independently infected sheath cells, significance was determined by an unpaired two-tailed Student's *t*-test (\* $p < 0.05$ , \*\* $p < 0.01$ , and \*\*\* $p < 0.001$ ). Representative data are shown from independently experiments and source data are provided as a Source Data file.



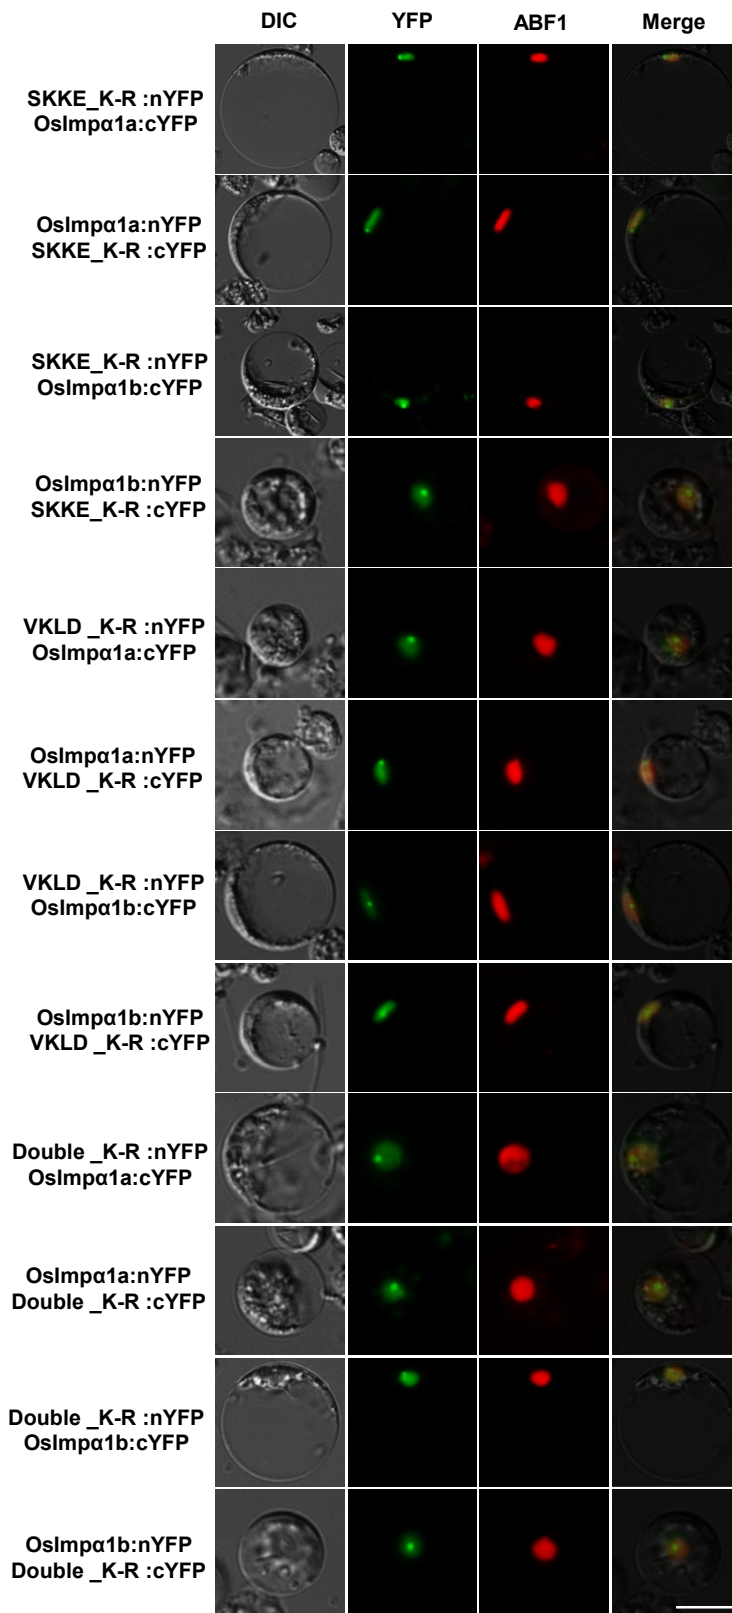

**Supplementary figure 9. in vivo interaction between SUMOylation site-mutated variants and two rice importin  $\alpha$ .** BiFC assay in the rice protoplasts. Three SUMOylation site-mutated variants (SKKE\_K-R, VKLD\_K-R, and Double\_K-R) were interacted with Oslmp $\alpha$ 1a and Oslmp $\alpha$ 1b. ABF1:mRFP was used for rice nuclei marker. Scale bar; 10  $\mu$ m. Representative data are shown from independently experiments and source data are provided as a Source Data file.

**Supplement Table 1. Summary of AlphaFold analysis.**

| <b>Protein A</b>       | <b>Protein B</b>  | <b>PAE<sup>a</sup><br/>average</b> | <b>pLDDT<sup>b</sup><br/>average</b> | <b>pTM<sup>c</sup></b> | <b>ipTM<sup>d</sup></b> |
|------------------------|-------------------|------------------------------------|--------------------------------------|------------------------|-------------------------|
| MoHTR1_NLS             | MoImp $\alpha$    | 24.07                              | 80.03                                | 0.768                  | 0.596                   |
|                        | OsImp $\alpha$    | 26.51                              | 78.40                                | 0.744                  | 0.507                   |
|                        | OsImp $\alpha$ 1a | 25.01                              | 84.24                                | 0.818                  | 0.486                   |
|                        | OsImp $\alpha$ 1b | 25.03                              | 82.07                                | 0.793                  | 0.491                   |
| MoHTR1 <sup>ΔNLS</sup> | MoImp $\alpha$    | 29.86                              | 65.93                                | 0.637                  | 0.231                   |
|                        | OsImp $\alpha$    | 30.10                              | 65.04                                | 0.620                  | 0.218                   |
|                        | OsImp $\alpha$ 1a | 29.86                              | 68.68                                | 0.657                  | 0.285                   |
|                        | OsImp $\alpha$ 1b | 29.96                              | 68.06                                | 0.643                  | 0.230                   |

<sup>a</sup> PAE (predicted aligned error) is the expected positional error. Scaled from 0.75 to 31.75, low score indicating low predicted error.

<sup>b</sup> pLDDT (predicted local distance difference test) is a per-residue measure of local confidence. Scaled from 0 to 100, high score indicating accurate prediction.

<sup>c</sup> pTM (predicted template modelling) means well predicted the overall structure.

<sup>d</sup> ipTM (interface predicted template modelling) means the accuracy of the predicted positions of the protein-protein complex.

**Supplement Table 2. Primer sequence used in this study.**

| <b>Name</b>                                                     | <b>Sequence 5'→3'</b>                                      |
|-----------------------------------------------------------------|------------------------------------------------------------|
| <b>Primers for site-directed mutagenesis</b>                    |                                                            |
| MoHTR1_NLS_mut_K/R-A                                            | CATGTGAAGCCCGGTGCGTCAGCGGCGGAGATTGCCAGAGG                  |
| MoHTR1_NLS_mut_K-R                                              | AAGCCCGGTAGGTCAAGGAGGGAGATTGCCAGAGG                        |
| MoHTR1_SUMO_VKLD_mut_K-R                                        | TACGGAGCCGCGGTGAGACTCGATAAACCCACG                          |
| MoHTR1_SUMO_SKKE_mut_K-R                                        | AAGCCCGGTAGGTCAAGGAAGGAGATTGCCAG                           |
| 05518_NLS_mut_K,R-A                                             | GCCGAGGCGCAGGCCGACGCGCGCCTTTCCAGTGT                        |
| 13742_NLS_mut_K,R-A                                             | GCAGTCCGTGCGCTCCCAGCGTCGTCATCAGGA                          |
| 14093_NLS_mut_K,R-A                                             | GATTCTCGGCGGCGACAGCGGCGAAGAGCAGGGAG                        |
| <b>Primers for generation of MoHTR1 NLS deletion mutant</b>     |                                                            |
| HTR1_NLS_del_5'flnk_F                                           | CACCATGGCCCCCATGCCTTCCGG                                   |
| HTR1_NLS_del_5'flnk_R                                           | CTTCACATGCCCTGTTCCTG                                       |
| HTR1_NLS_del_3'flnk_F                                           | CAGGAACAGGGGCATGTAAGATTGCCAGAGGATCAGGAAC                   |
| HTR1_NLS_del_3'flnk_R                                           | TTAGAGCTGGACCGGGTTCGCCTTG                                  |
| <b>Primers for Luciferase assay</b>                             |                                                            |
| MYB4pro HindIII F                                               | AAGCTTAAATTTATTTGGTATATTATATAGT                            |
| MYB4pro BamHI R                                                 | GGATCCAAGGTTTGAACGGGGA                                     |
| HTR1_CACC_F                                                     | CACCATGGCCCCCATGCCTTCCGGCT                                 |
| HTR1_R                                                          | TTAGAGCTGGACCGGGTTCGCCT                                    |
| <b>Primers for local observation of cytoplasmic proteins</b>    |                                                            |
| PWL2_promoter_F_atlb                                            | AAAAAGCAGGCTTAGCGTCAGTGAACAAACCTG                          |
| PWL2_ORF_R_atlb                                                 | AGAAAGCTGGGTACATAATATTGCAGCCCTCTTCTCG                      |
| PWL2_ORF_R_PGRSKKE_atlb                                         | AGAAAGCTGGGTACTCCTTCTTTGACCTACCGGGCATAATATTGCAGCCCTCTTCTCG |
| PWL2_ORF_R_SVNLS_atlb                                           | AGAAAGCTGGGTAGACCTTCTTCTTCTTGGGCATAATATTGCAGCCCTCTTCTCG    |
| Pita_promoter_F_atlb                                            | AAAAAGCAGGCTTAGCCGAGTCTGTTCTGAGGGTAG                       |
| Pita_ORF_R_atlb                                                 | AGAAAGCTGGGTAACAATATTTATAACGTGCACATTG                      |
| Pita_ORF_R_PGRSKKE_atlb                                         | AGAAAGCTGGGTACTCCTTCTTTGACCTACCGGGACAATATTTATAACGTGCACATTG |
| Pita_ORF_R_SVNLS_atlb                                           | AGAAAGCTGGGTAGACCTTCTTCTTCTTGGGACAATATTTATAACGTGCACATTG    |
| PWL2_CDS_F_cacc                                                 | CACCATGGGTGGCGGGTGGACTAACAAAC                              |
| PWL2_CDS_F_PGRSKKE_cacc                                         | CACCATGCCCGGTAGGTCAAAGAAGGAGGGTGGCGGGTGGACTAACAAAC         |
| PWL2_CDS_F_SV_cacc                                              | CACCATGCCCAAGAAGAAGAGGAAGGTTCGGTGGCGGGTGGACTAACAAAC        |
| PWL2_CDS_R                                                      | CATAATATTGCAGCCCTCTTCTCG                                   |
| Pita_CDS_F_cacc                                                 | CACCATGTTCCACCAACATTGGCACCTTTTC                            |
| Pita_CDS_F_PGRSKKE_cacc                                         | CACCATGCCCGGTAGGTCAAAGAAGGAGTTCACCAACATTGGCACCTTTTC        |
| Pita_CDS_F_SV_cacc                                              | CACCATGCCCAAGAAGAAGAGGAAGGTCTTCACCAACATTGGCACCTTTTC        |
| Pita_ORF_R                                                      | ACAATATTTATAACGTGCACATTG                                   |
| MoHTR1_NLS_F_CACC                                               | CACCATGCCCGGTAGGTCAAAGAAGGAG                               |
| MoHTR1_NLS_R                                                    | CTCCTTCTTTGACCTACCGGGCAT                                   |
| SVNLS_F_CACC                                                    | CACCATGCCCAAGAAGAAGAGGAAGGTC                               |
| SVNLS_R                                                         | GACCTTCTTCTTCTTGGGCAT                                      |
| <b>Primers for observation of nuclear effector candidates</b>   |                                                            |
| MGG_05518_qRT_F                                                 | GCTTGGAAAGCGGAATTTGCAG                                     |
| MGG_05518_qRT_R                                                 | CTCCGTGGAATGCTTTGACATG                                     |
| MGG_13742_qRT_F                                                 | GAAGGAGTCCGACCACGTTAATG                                    |
| MGG_13742_qRT_R                                                 | GAAGGTGCCGTAGGTGCCTTAG                                     |
| MGG_14093_qRT_F                                                 | CGTACGGTCAAGAGCGAGTAC                                      |
| MGG_14093_qRT_R                                                 | CGAGAATCGCCAAAGCCCTTA C                                    |
| MGG_14093_CACC_F                                                | CACCATGGCCCCTGTGTGCGAATCTGT                                |
| MGG_14093_R                                                     | GTTCCAGACTTCATGCTCTGTG                                     |
| MGG_05518_CACC_F                                                | CACCATGCGCTCCGAGGTGACAGCCGTGAT                             |
| MGG_05518_R                                                     | GCTATCGAATCTACGTTTCATC                                     |
| MGG_13742_CACC_F                                                | CACCATGGCGCCTTTGCCATTCAATAGC                               |
| MGG_13742_R                                                     | ATTCCCCTTGGGCCTTCTC                                        |
| <b>Primers for observation of RxKK containing rice proteins</b> |                                                            |
| RxKK_03g12550_CDS_CACC_F                                        | CACCATGAATGTACAAGTCCACAGAG                                 |
| RxKK_03g12550_CDS_R                                             | TCTCGATATAAATGAAAACATGCTG                                  |
| RxKK_08g09300_CDS_CACC_F                                        | CACCATGGATCTGGAGACGGGAGA                                   |
| RxKK_08g09300_CDS_R                                             | AGAAAAAATGGACGCTACTAACC                                    |
| RxKK_03g54970_CDS_CACC_F                                        | CACCATGCAATCTGGGGCTCCTGA                                   |
| RxKK_03g54970_CDS_R                                             | GTTCCAGGAGGCGACAACGA                                       |
| RxKK_05g19970_CDS_CACC_F                                        | CACCATGGACGACAGCTGCGCGGTGT                                 |
| RxKK_05g19970_CDS_R                                             | CTTCTTCCATTGCCCGTAAAG                                      |
| RxKK_04g53700_CDS_CACC_F                                        | CACCATGTTTCATATCCACACCTCTC                                 |
| RxKK_04g53700_CDS_R                                             | TGGGCTTTTCTTCTTGGCA                                        |
| <b>Primers for qRT-PCR plant defense related genes</b>          |                                                            |

---

|            |                         |
|------------|-------------------------|
| Actin_F    | GCGTGGACAAAGTTTTCAACCG  |
| Actin_R    | TCTGGTACCCTCATCAGGCATC  |
| PR1a_RT_F  | GGCACGAGTCGATCTCCA      |
| PR1a_RT_R  | ACCAGCAAGCAGCAGGAT      |
| PR1b_RT_F  | GGCAACTTCGTCCGACAGA     |
| PR1b_RT_R  | CCGTGGACCTGTTTACATTTT   |
| PR3_RT_F   | GGCGTTCTGGTTCTGGATGAC   |
| PR3_RT_R   | CGCCGTTGATGATGTTGGTC    |
| PR4_RT_F   | TGGGACCTGAACAAAGTGAGC   |
| PR4_RT_R   | TGGATACACTTGCCACACGAG   |
| PR10a_RT_F | ACACTCGACGGAGACGAAGC    |
| PR10a_RT_R | CAGGGTGAGCGACGAGGTA     |
| PAL_RT_F   | CCCTGCCAATCTGCTGAACTA   |
| PAL_RT_R   | GCCGCTATGCAACGAAGAAT    |
| NPR1_RT_F  | CACGCCTAAGCCTCGGATTA    |
| NPR1_RT_R  | TCAGTGAGCAGCATCCTGACTAG |
| LOX1_RT_F  | CGATGGCCGGAACAAGGATA    |
| LOX1_RT_R  | TGGAGCGTTTTGTCTCATCA    |
| ACS1_RT_F  | TCGGCCAAGACCCTCGACG     |
| ACS1_RT_R  | CGAAAGGAATCTGCTACTGCTGC |
| EBP89_RT_F | TGACGATCTTGCTGAACTGAA   |
| EBP89_RT_R | CAATCCCACAAACTTTACACA   |

**Primers for qRT-PCR of MoHTR1 target candidates**

|                |                         |
|----------------|-------------------------|
| SRZ1_qRT_F     | CTTTGATGGTGGGGACATGTC   |
| SRZ1_qRT_R     | GTGCTCATTGCATCCAGACC    |
| OsABIL2_qRT_F  | CCTGAGGTCACAGTTGTCCG    |
| OsABIL2_qRT_R  | CGCATTCTTCTTGTGCCATAG   |
| OsBURP16_qRT_F | GTATACTACTGCCACTCGGTG   |
| OsBURP16_qRT_R | CACCTAGTGCCACAAAAGC     |
| OsZIP39_qRT_F  | CAATGAAGCGATTCCACTCAC   |
| OsZIP39_qRT_R  | GATCGGCTAGCACCGAGACAAC  |
| OsCCT11_qRT_F  | CAGCAGCCATCCATTGAGCGAG  |
| OsCCT11_qRT_R  | GAGCAGTACTAGGTCCTCTTTG  |
| OsHKT2_qRT_F   | GTGCAGAACTTGGCATTTCAC   |
| OsHKT2_qRT_R   | CCATATGCACTGATGATTTTC   |
| OsJAZ13_qRT_F  | GCAGATGACCATCTTCTAC     |
| OsJAZ13_qRT_R  | CTTCTCTTCTCCATGAAC      |
| OsLH2_qRT_F    | GGATCTTTTACCACCTGGTC    |
| OsLH2_qRT_R    | GAAATCGAGCCATGATCTTG    |
| OsLSU1_qRT_F   | GCAAGCAAATGGAGGAAGTAG   |
| OsLSU1_qRT_R   | CTTTGCTTCATAGTCTTTCACG  |
| CRK10_qRT_F    | CATCGAGTTGATCGATCCATC   |
| CRK10_qRT_R    | CCAGTACTACTAAGCATGGC    |
| OsAOS2_qRT_F   | GTTACATGGGAGCACTGGACTAG |
| OsAOS2_qRT_R   | CTGACATCAATGGCCATACAG   |
| OsARD2_qRT_F   | GATTGTTTTGCCTGCGGGAATG  |
| OsARD2_qRT_R   | CCTTTCTAGCTGGCAGATGG    |
| Myb4_qRT_F     | TCTGAATTCTGTGCTACGCAG   |
| Myb4_qRT_R     | TTCTTGATCTCGTTGTCCGTC   |
| OsWRKY53_qRT_F | GTGATCACCACCTACGAGG     |
| OsWRKY53_qRT_R | GAGCATCTCGAGGGTGTAG     |
| Pi21_qRT_F     | GAAGCCCAAGCCATGCGAGAAG  |
| Pi21_qRT_R     | CTCAGGCTTTGGGCAGCAC     |
| OsiSAP7_qRT_F  | GAAGAAGGTGGGGCTGAC      |
| OsiSAP7_qRT_R  | CGCTCTTGATGTCGAAGC      |
| OsRacB_qRT_F   | GTGCTGTTTCTATCACCACCTG  |
| OsRacB_qRT_R   | GCTGCAGCACCACTTTATTG    |

**Primers for yeast two hybrid assay**

|                       |                               |
|-----------------------|-------------------------------|
| MoHTR1_CDS_F_CACC     | CACC ATGGCCCCCATGCCTTC        |
| MoHTR1_CDS_R          | TCAGAGCTGGACCGGTGCGCTT        |
| MGG_15072_CDS_F_CACC  | CACC ATG GCCGAGCGCTACATCCCCGA |
| MGG_15072_CDS_R       | TTACATGTCCATCGACTCGCCAC       |
| Os01g14950_CDS_F_CACC | CACCATGTGCTGCGCCCCGAGCGA      |
| Os01g14950_CDS_R      | TTATTTGAATTGAGCAGCACCCAC      |
| Os01g24060_CDS_F_CACC | CACCATGTGCTGCGGCCGAGCGA       |
| Os01g24060_CDS_R      | CTACGGTGCATTTCCATCCAAATCG     |
| Os05g06350_CDS_F_CACC | CACCATGTGCTGCGGCCGAGCGA       |
| Os05g06350_CDS_R      | TCAGCCAAAGTTGAATCCACC         |

**Primers for protein purification**

|                |                              |
|----------------|------------------------------|
| HTR1_BamHI_F   | GGATCCATGGCCCCCATGCCTTCCGGCT |
| HTR1_HindIII_R | AAGCTTTTAGAGCTGGACCGGGTCCGCT |

---

**Supplement Table 3. Summary of RNA sequencing quality and read counts for 9 libraries.**

|                                            | <b>Raw reads (bp)</b> | <b>Clean reads (bp)</b> | <b>Raw reads</b> | <b>Clean reads</b> | <b>Mapped reads</b> |
|--------------------------------------------|-----------------------|-------------------------|------------------|--------------------|---------------------|
| <b>Wild type_rep1</b>                      | 10,718,392,532        | 9,409,940,107           | 70,982,732       | 62,471,990         | 53,461,781          |
| <b>Wild type_rep2</b>                      | 9,764,181,554         | 9,140,221,219           | 64,663,454       | 60,655,976         | 52,839,261          |
| <b>Wild type_rep3</b>                      | 10,573,746,612        | 9,082,276,147           | 70,024,812       | 60,338,330         | 49,384,131          |
| <b>ΔMohtr1_rep1</b>                        | 10,222,059,760        | 9,172,390,147           | 67,695,760       | 60,915,964         | 51,154,663          |
| <b>ΔMohtr1_rep2</b>                        | 10,531,879,446        | 9,227,505,722           | 69,747,546       | 61,292,176         | 51,107,624          |
| <b>ΔMohtr1_rep3</b>                        | 10,798,865,868        | 9,574,995,126           | 71,515,668       | 63,563,966         | 53,839,948          |
| <b>ΔMohtr1::MoHTR1<sup>ANLS</sup>_rep1</b> | 8,860,998,006         | 7,795,955,877           | 58,682,106       | 51,746,322         | 44,792,616          |
| <b>ΔMohtr1::MoHTR1<sup>ANLS</sup>_rep2</b> | 10,423,620,600        | 8,984,551,955           | 69,030,600       | 59,793,262         | 46,083,871          |
| <b>ΔMohtr1::MoHTR1<sup>ANLS</sup>_rep3</b> | 10,668,830,406        | 9,207,919,792           | 70,654,506       | 61,163,400         | 50,945,397          |

## Supplementary References

- 1 Singh, S. K. *et al.* The nuclear effector ArPEC25 from the necrotrophic fungus *Ascochyta rabiei* targets the chickpea transcription factor CaβLIM1a and negatively modulates lignin biosynthesis for host susceptibility. *Plant Cell* **35**, 1134-1159 (2023).
- 2 Vargas, W. A. *et al.* A fungal effector with host nuclear localization and DNA-binding properties is required for maize anthracnose development. *MPMI*. **29**, 83-95 (2016).
- 3 Xu, Z., Xiong, D., Han, Z. & Tian, C. A putative effector CcSp84 of *Cytospora chrysosperma* localizes to the plant nucleus to trigger plant immunity. *Int. J. Mol. Sci.* **23**, 1614 (2022).
- 4 Li, T. *et al.* Secretome profiling reveals virulence-associated proteins of *Fusarium proliferatum* during interaction with banana fruit. *Biomolecules* **9**, 246 (2019).
- 5 Klopffholz, S., Kuhn, H., & Requena, N. A secreted fungal effector of *Glomus intraradices* promotes symbiotic biotrophy. *Curr. Biol.* **21**, 1204-1209 (2011).
- 6 Plett, J. M. *et al.* A secreted effector protein of *Laccaria bicolor* is required for symbiosis development. *Curr. Biol.* **21**, 1197-1203 (2011).
- 7 Plett, J. M. *et al.* Effector MiSSP7 of the mutualistic fungus *Laccaria bicolor* stabilizes the Populus JAZ6 protein and represses jasmonic acid (JA) responsive genes. *PNAS*. **111**, 8299-8304 (2014).
- 8 Kim, S. *et al.* Two nuclear effectors of the rice blast fungus modulate host immunity via transcriptional reprogramming. *Nat. Commun.* **11**, 5845 (2020).
- 9 Ahmed, M. B. *et al.* A rust fungal effector binds plant DNA and modulates transcription. *Sci. Rep.* **8**, 14718 (2018).
- 10 Zhang, X. *et al.* Crystal structure of the *Melampsora lini* effector AvrP reveals insights into a possible nuclear function and recognition by the flax disease resistance protein P. *Mol. Plant Pathol.* **19**, 1196-1209 (2018).
- 11 Tang, C. *et al.* A rust fungus effector directly binds plant pre-mRNA splice site to reprogram alternative splicing and suppress host immunity. *Plant Biotechnol. J.* **20**, 1167-1181 (2022).
- 12 Petre, B. *et al.* Heterologous expression screens in *Nicotiana benthamiana* identify a candidate effector of the wheat yellow rust pathogen that associates with processing bodies. *PLoS One* **11**, e0149035 (2016).
- 13 Qin, J. *et al.* The plant-specific transcription factors CBP60g and SARD1 are targeted by a *Verticillium* secretory protein VdSCP41 to modulate immunity. *eLife* **7**, e34902 (2018).
- 14 Zhang, Y. *et al.* *Verticillium dahliae* secretory effector PevD1 induces leaf senescence by promoting ORE1-mediated ethylene biosynthesis. *Mol. Plant* **14**, 1901-1917 (2021).
- 15 Zhang, L. *et al.* The *Verticillium*-specific protein VdSCP7 localizes to the plant nucleus and modulates immunity to fungal infections. *New Phytol.* **215**, 368-381 (2017).
- 16 Yin, C. M. *et al.* A secreted ribonuclease effector from *Verticillium dahliae* localizes in the plant nucleus to modulate host immunity. *Mol. Plant Pathol.* **23**, 1122-1140 (2022).
- 17 Liu, L. *et al.* *Verticillium dahliae* secreted protein Vd424Y is required for full virulence, targets the nucleus of plant cells, and induces cell death. *Mol. Plant Pathol.* **22**, 1109-1120 (2021).
- 18 Rafiei, V., Vélèz, H., Piombo, E., Dubey, M., & Tzelepis, G. *Verticillium longisporum* phospholipase VlsPLA2 is a virulence factor that targets host nuclei and modulates plant immunity. *Mol. Plant Pathol.* **24**, 1078-1092 (2023).
- 19 Hoang, C. V., Bhaskar, C. K., & Ma, L. S. A novel core effector Vp1 promotes fungal colonization and virulence of *Ustilago maydis*. *J. Fungi* **7**, 589 (2021).
