# Supplementary material for: Nuclear localization sequence of MoHTR1, a Magnaporthe oryzae effector, for transcriptional reprogramming of immunity genes in rice
Source: PubMed Central journal article supplement — Nat Commun. 2024 Nov 11;15:9764. doi: 10.1038/s41467-024-54272-4 (PMC11555045; doi:10.1038/s41467-024-54272-4), 2024-11-11
Supplement: 41467_2024_54272_MOESM3_ESM.pdf [file 41467_2024_54272_MOESM3_ESM.pdf]

## **Description of additional supplementary files**

**Supplementary Data 1. List of RxKK containing rice proteins (Sheet 1)** List of rice proteins that predicted to have nuclear localization through four subcellular localization prediction tools. **(Sheet 2)** List of proteins that contained RxKK sequences within predicted monopartite NLS.

**Supplementary Data 2. RNA sequencing data analysis in wild-type,  $\Delta Mohtr1$ , and  $\Delta Mohtr1::MoHTR1\Delta NLS$  infected rice (Sheet 1)** Differential expressed genes (DEGs) in wild type,  $\Delta Mohtr1$ , and  $\Delta Mohtr1::MoHTR1^{\Delta NLS}$  infected rice. **(Sheet 2)** Gene ontology analysis in DEGs of wild type vs.  $\Delta Mohtr1$ . **(Sheet 3)** Gene ontology analysis in DEGs of wild type vs.  $\Delta Mohtr1::MoHTR1^{\Delta NLS}$ . **(Sheet 4)** Gene ontology analysis in DEGs of  $\Delta Mohtr1$  vs.  $\Delta Mohtr1::MoHTR1^{\Delta NLS}$ .

**Supplementary Data 3. The list of reported nuclear effectors in fungal plant pathogens**
